# Supplementary material for: Herb-target interaction network analysis helps to disclose molecular mechanism of traditional Chinese medicine
Source: PubMed Central journal article supplement (PMC5105066; doi:10.1038/srep36767), 2016-11-11
Supplement: srep36767-s1.pdf [file srep36767-s1.pdf]

## Supplementary Information

# Herb-target interaction network analysis helps to disclose molecular mechanism of traditional Chinese medicine

Hao Liang<sup>1</sup>, Hao Ruan<sup>2</sup>, Qi Ouyang<sup>1,3,4</sup> and Luhua Lai<sup>1,2,3,4,\*</sup>

1 Peking-Tsinghua Center for Life Sciences, Academy for Advanced Interdisciplinary Studies, Peking University, Beijing 100871, China.

2 Beijing National Laboratory for Molecular Sciences, State Key Laboratory for Structural Chemistry of Unstable and Stable Species, College of Chemistry and Molecular Engineering, Peking University, Beijing 100871, China.

3 State Key Laboratory for Artificial Microstructures and Mesoscopic Physics, School of Physics, Peking University, Beijing 100871, China.

4 Center for Quantitative Biology, Academy for Advanced Interdisciplinary Studies, Peking University, Beijing 100871, China.

\*To whom correspondence should be addressed.

Correspondence and requests for materials should be addressed to L.L. (lh lai@pku.edu.cn)

## Contents

**Supplementary Figure S1.** Chemical property distributions of SH formula, AR group and SP group.

**Supplementary Figure S2.** Herb-target network of HIV-1 related proteins and SH formula, AR group, SP group and XFZY group (top 30% cutoff).

**Supplementary Figure S3.** Herb-target network of HIV-1 related proteins and SH formula, AR group, SP group and XFZY group (top 50% cutoff).

**Supplementary Figure S4.** Overlap compounds between SH formula and control groups.

**Supplementary Table S1** HTF of active herbs in SH formula against 17 viral proteins

**Supplementary Table S2** HTF of active herbs in AR group against 17 viral proteins

**Supplementary Table S3** HTF of active herbs in SP group against 17 viral proteins

**Supplementary Table S4** HTF of active herbs in XFZY group against 17 viral proteins

**Supplementary Table S5** EFs of overall and individual herbs of SH formula and XFZY groups

**Supplementary Table S6.** Number of potential inhibitors in each group to 17 viral proteins (top 10% cutoff)

**Supplementary Table S7.** Number of potential inhibitors in each group to 17 viral proteins (top 20% cutoff)

**Supplementary Table S8** Number of potential inhibitors in each group to 17 viral proteins (top 30% cutoff)

**Supplementary Table S9** HTF of active herbs in SH group against 17 viral proteins (top 30% cutoff)

**Supplementary Table S10** HTF of active herbs in AR group against 17 viral proteins (top 30% cutoff)

**Supplementary Table S11** HTF of active herbs in SP group against 17 viral proteins (top 30% cutoff)

**Supplementary Table S12** HTF of active herbs in XFZY group against 17 viral proteins (top 30% cutoff)

**Supplementary Table S13** Number of potential inhibitors in each group to 17 viral proteins (top 50% cutoff)

**Supplementary Table S14** HTF of active herbs in SH group against 17 viral proteins (top 50% cutoff)

**Supplementary Table S15** HTF of active herbs in AR group against 17 viral proteins (top 50% cutoff)

**Supplementary Table S16** HTF of active herbs in SP group against 17 viral proteins (top 50% cutoff)

**Supplementary Table S17** HTF of active herbs in XFZY group against 17 viral proteins (top 50% cutoff)

**Supplementary Table S18.** The Latin name, Chinese name and compound number of TCMHD herbs.

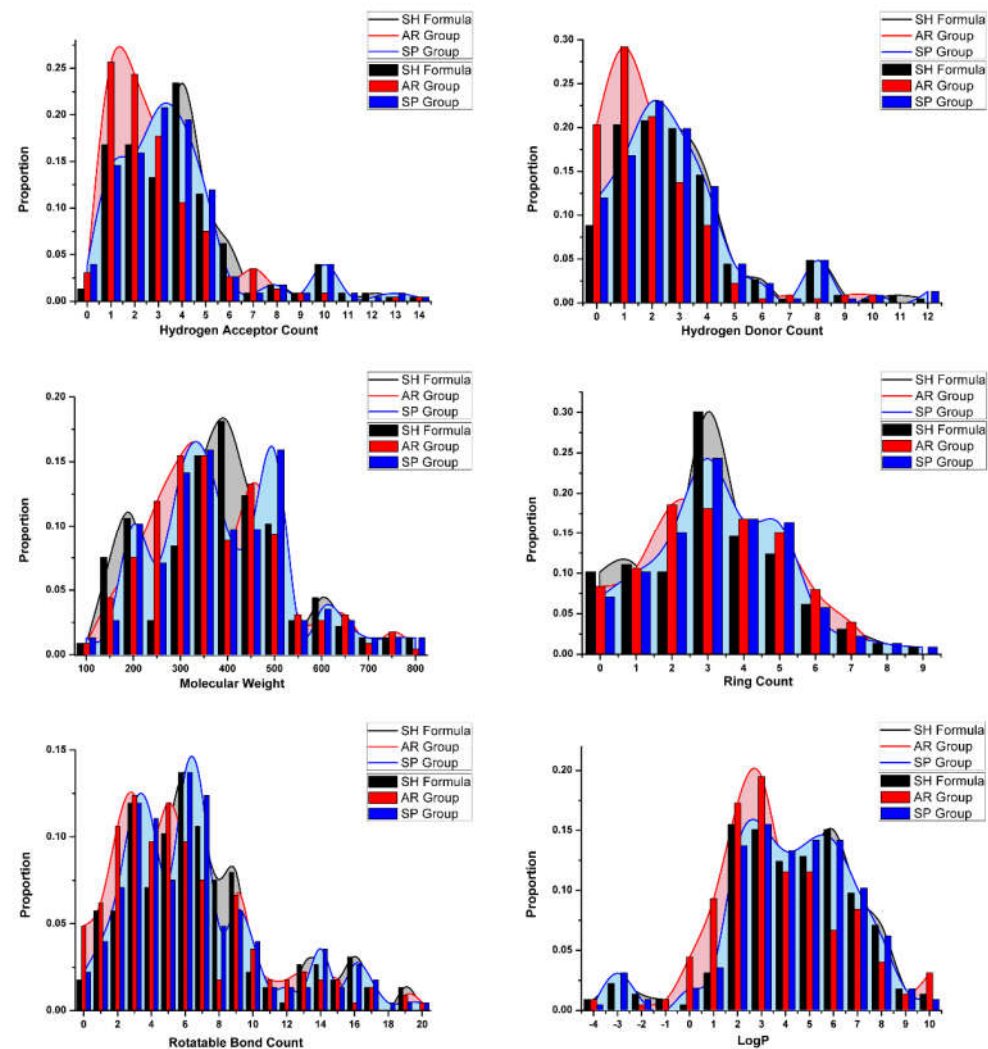

Supplementary Figure S1. Chemical property distributions of SH formula (black histogram and grey area), AR group (red histogram and pink area) and SP group (blue histogram and cyan area).

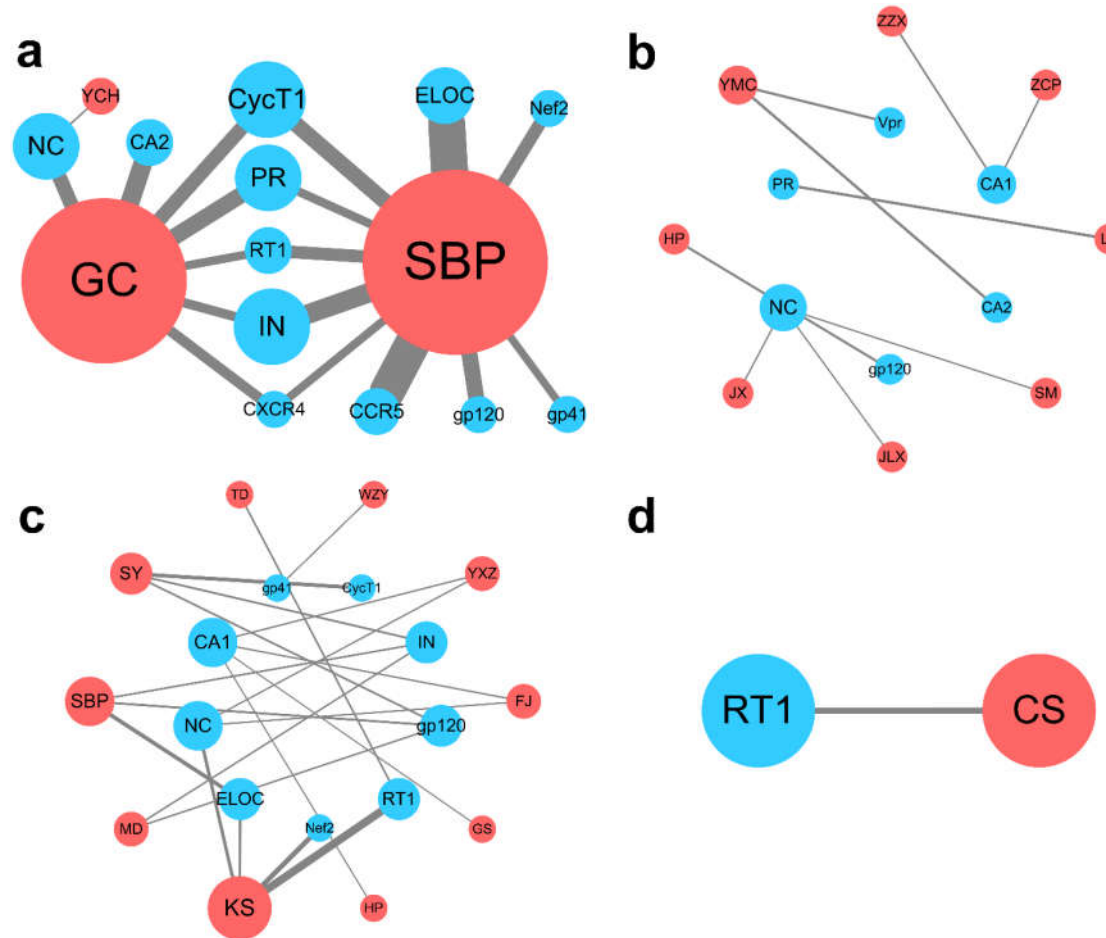

**Supplementary Figure S2. Herb-target network of HIV-1 related proteins and SH formula (a), AR group (b), SP group (c) and XFZY group (d).** The cutoff is set as top 30% by all four software. GC, SBP, YCH, and CS represents *Glycyrrhiza uralensis*, *Morus alba*, *Artemisia capillaries* and *Paeonia rubra*, respectively. Node sizes of herbs and targets are weighted by active compound numbers, edge sizes are weighted by HTFs.

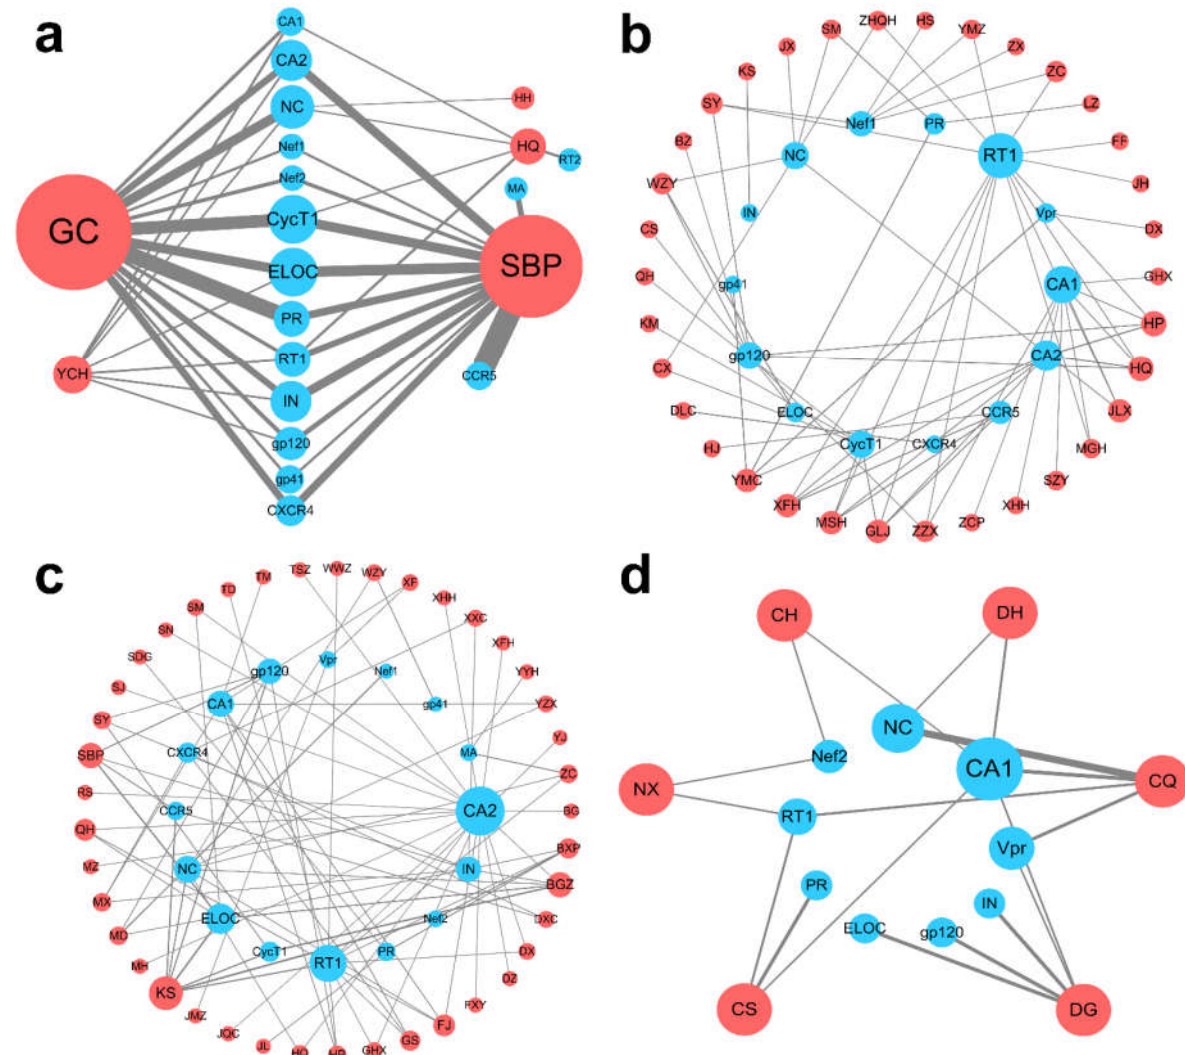

**Supplementary Figure S3. Herb-target network of HIV-1 related proteins and SH formula (a), AR group (b), SP group (c) and XFZY group (d).** The cutoff is set as top 50% by all four software. GC, HH, HQ, SBP, YCH, CH, CQ, CS, DG, DH, NX represents *Glycyrrhiza uralensis*, *Carthamus tinctorius*, *Astragalus membranaceus*, *Morus alba*, *Artemisia*

*capillaries*, *Bupleurum chinense*, *Ligusticum wallichii*, *Paeonia rubra*, *Angelica sinensis*, *Rehmannia glutinosa* and *Achyranthes bidentata* respectively. Node sizes of herbs and targets are weighted by active compound numbers, edge sizes are weighted by HTFs.

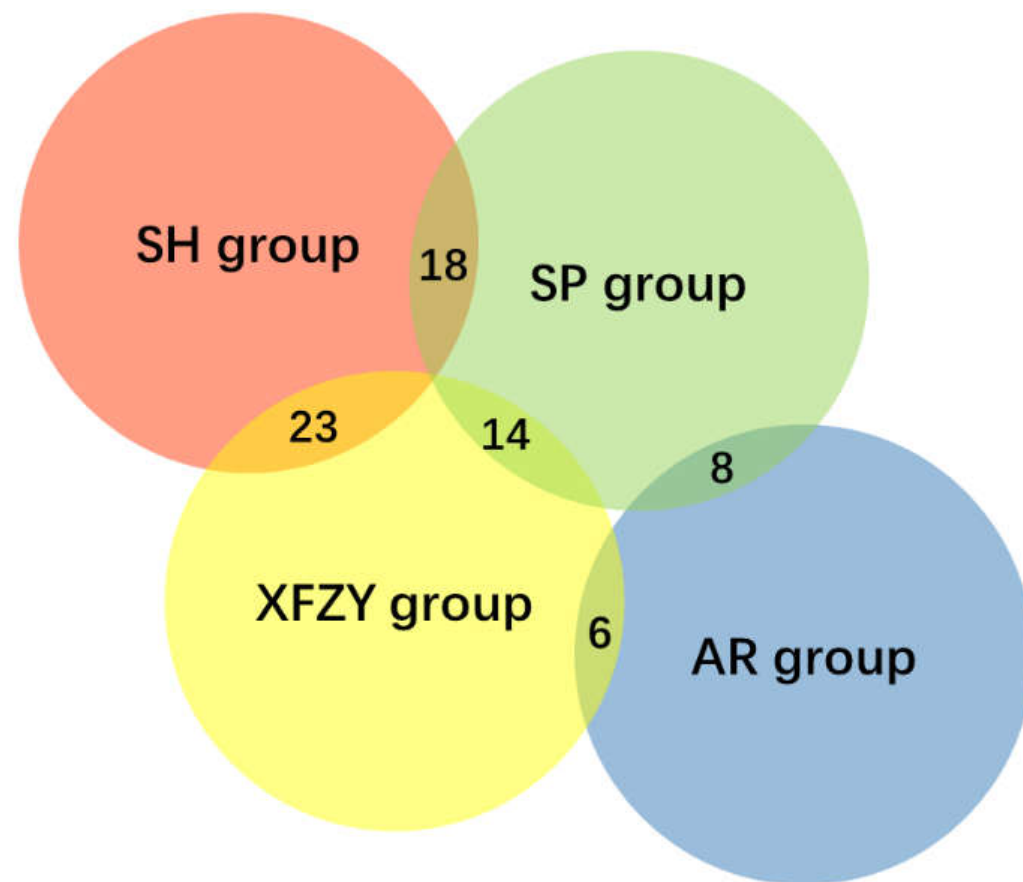

Supplementary Figure S4. Overlap compounds between SH formula and control groups.

**Supplementary Table S1. HTF of active herbs in SH formula against 17 viral proteins.**

| <b>Herb</b>                    | <b>PR</b> | <b>RT1</b> | <b>RT2</b> | <b>IN</b> | <b>NC</b> | <b>CA1</b> | <b>CA2</b> | <b>MA</b> | <b>Nef1</b> | <b>Nef2</b> | <b>Vpr</b> | <b>gp120</b> | <b>gp41</b> | <b>CCR5</b> | <b>CXCR4</b> | <b>CycT1</b> | <b>ELOC</b> |
|--------------------------------|-----------|------------|------------|-----------|-----------|------------|------------|-----------|-------------|-------------|------------|--------------|-------------|-------------|--------------|--------------|-------------|
| <i>Glycyrrhiza uralensis</i>   | 107.65    | 33.83      | 0.00       | 83.80     | 62.67     | 24.70      | 41.27      | 0.00      | 0.00        | 0.00        | 0.00       | 16.60        | 11.85       | 0.00        | 65.20        | 79.03        | 0.00        |
| <i>Carthamus tinctorius</i>    | 0.00      | 0.00       | 0.00       | 0.00      | 1.46      | 0.00       | 0.00       | 0.00      | 0.00        | 0.00        | 0.00       | 0.00         | 0.00        | 0.00        | 0.00         | 0.00         | 0.00        |
| <i>Astragalus membranaceus</i> | 0.00      | 8.62       | 0.00       | 0.00      | 0.00      | 5.92       | 0.00       | 0.00      | 0.00        | 0.00        | 0.00       | 0.00         | 0.00        | 0.00        | 0.00         | 5.21         | 0.00        |
| <i>Morus alba</i>              | 75.02     | 78.98      | 0.00       | 133.87    | 0.00      | 0.00       | 69.70      | 0.00      | 0.00        | 61.82       | 0.00       | 44.15        | 17.66       | 248.05      | 75.35        | 77.22        | 136.78      |
| <i>Artemisia capillaries</i>   | 0.00      | 0.00       | 0.00       | 0.00      | 10.10     | 13.35      | 9.08       | 0.00      | 0.00        | 0.00        | 0.00       | 8.57         | 0.00        | 0.00        | 0.00         | 0.00         | 11.85       |

















**Supplementary Table S13. Number of potential inhibitors in each group to 17 viral proteins (top 50% cutoff).**

| Group      | PR | RT1 | RT2 | IN | NC | CA1 | CA2 | MA | Nef1 | Nef2 | Vpr | gp120 | gp41 | CCR5 | CXCR4 | CycT1 | ELOC | Total |
|------------|----|-----|-----|----|----|-----|-----|----|------|------|-----|-------|------|------|-------|-------|------|-------|
| SH formula | 6  | 6   | 1   | 8  | 9  | 3   | 8   | 1  | 2    | 2    | 0   | 5     | 3    | 3    | 4     | 11    | 11   | 83    |
| AR group   | 3  | 15  | 0   | 1  | 6  | 11  | 8   | 0  | 5    | 0    | 2   | 6     | 1    | 4    | 1     | 6     | 2    | 71    |
| SP group   | 3  | 14  | 0   | 7  | 8  | 8   | 21  | 2  | 1    | 2    | 2   | 7     | 1    | 3    | 4     | 4     | 10   | 97    |
| XFZY group | 1  | 3   | 0   | 1  | 7  | 11  | 0   | 0  | 0    | 2    | 5   | 1     | 0    | 0    | 0     | 0     | 1    | 32    |

**Supplementary Table S14. HTF of active herbs in SH group against 17 viral proteins (top 50% cutoff).**

| Herb                           | PR     | RT1   | RT2   | IN     | NC     | CA1   | CA2    | MA    | Nef1  | Nef2  | Vpr  | gp120 | gp41  | CCR5   | CXCR4 | CycT1  | ELOC   |
|--------------------------------|--------|-------|-------|--------|--------|-------|--------|-------|-------|-------|------|-------|-------|--------|-------|--------|--------|
| <i>Glycyrrhiza uralensis</i>   | 193.70 | 32.99 | 0.00  | 72.63  | 115.18 | 32.11 | 77.65  | 0.00  | 20.34 | 37.38 | 0.00 | 42.42 | 23.34 | 0.00   | 84.76 | 153.75 | 111.89 |
| <i>Carthamus tinctorius</i>    | 0.00   | 0.00  | 0.00  | 0.00   | 1.09   | 0.00  | 0.00   | 0.00  | 0.00  | 0.00  | 0.00 | 0.00  | 0.00  | 0.00   | 0.00  | 0.00   | 0.00   |
| <i>Astragalus membranaceus</i> | 0.00   | 21.36 | 22.10 | 0.00   | 6.41   | 9.87  | 0.00   | 0.00  | 0.00  | 0.00  | 0.00 | 0.00  | 0.00  | 0.00   | 0.00  | 8.68   | 0.00   |
| <i>Morus alba</i>              | 88.66  | 70.00 | 0.00  | 105.47 | 0.00   | 0.00  | 105.69 | 62.79 | 19.63 | 36.53 | 0.00 | 52.17 | 20.86 | 293.15 | 89.05 | 112.62 | 127.62 |
| <i>Artemisia capillaries</i>   | 0.00   | 14.46 | 0.00  | 12.58  | 10.60  | 18.69 | 12.72  | 0.00  | 0.00  | 0.00  | 0.00 | 11.99 | 0.00  | 0.00   | 0.00  | 0.00   | 11.06  |













Supplementary Table S18. The Latin name, Chinese name and compound number of TCMHD herbs.

| Latin name                       | Chinese name   | Compound number | Latin Name                         | Chinese Name    | Compound number |
|----------------------------------|----------------|-----------------|------------------------------------|-----------------|-----------------|
| <i>Artemisia argyi</i>           | aiye           | 34              | <i>Gentiana scabra</i>             | longdan         | 8               |
| <i>Ferula assafoetida</i>        | awei           | 17              | <i>Aloe barbadensis</i>            | luhui           | 31              |
| <i>Croton tiglium</i>            | badou          | 33              | <i>Apocynum venetum</i>            | luobumaye       | 9               |
| <i>Stemona tuberosa</i>          | baibu          | 23              | <i>Trachelospermum jasminoides</i> | luoshiteng      | 10              |
| <i>Ginkgo biloba</i>             | baiguo         | 35              | <i>Portulaca oleracea</i>          | machixian       | 7               |
| <i>Bletilla striata</i>          | baiji          | 25              | <i>Ephedra sinica</i>              | mahuang         | 21              |
| <i>Chelidonium majus</i>         | baiqucai       | 28              | <i>Ophiopogon japonicus</i>        | maidong         | 32              |
| <i>Paeonia lactiflora</i>        | baishao        | 33              | <i>Hordeum vulgare</i>             | maiya           | 11              |
| <i>Pulsatilla chinensis</i>      | baitouweng     | 14              | <i>Vitex trifolia</i>              | manjingzi       | 29              |
| <i>Cynanchum atratum</i>         | baiwei         | 10              | <i>Rhododendron dauricum</i>       | manshanhong     | 19              |
| <i>Dictamnus dasycarpus</i>      | baixianpi      | 22              | <i>Strychnos nuxvomica</i>         | maqianzi        | 28              |
| <i>Angelica dahurica</i>         | baizhi         | 36              | <i>Rosa rugosa</i>                 | meiguihua       | 47              |
| <i>Atractylodes macrocephala</i> | baizhu         | 10              | <i>Prunus mume</i>                 | meihua          | 3               |
| <i>Illicium verum</i>            | bajiaohuixiang | 17              | <i>Dryopteris crassirhizoma</i>    | mianmaguanzhong | 12              |
| <i>Morinda officinalis</i>       | bajitian       | 10              | <i>Commiphora myrrha</i>           | moyao           | 11              |
| <i>Isatis indigotica</i>         | banlangen      | 21              | <i>Paeonia suffruticosa</i>        | mudanpi         | 7               |
| <i>Pinellia ternata</i>          | banxia         | 14              | <i>Oroxylum indicum</i>            | muhudie         | 4               |
| <i>Syringa reticulata</i>        | baomazipi      | 8               | <i>Vitex negundo</i>               | mujingye        | 12              |
| <i>Menispermum dauricum</i>      | beidougen      | 35              | <i>Akebia quinata</i>              | mutong          | 10              |
| <i>Glehnia littoralis</i>        | beishashen     | 41              | <i>Aucklandia lappa</i>            | muxiang         | 53              |
| <i>Piper longum</i>              | biba           | 12              | <i>Equisetum hiemale</i>           | muzei           | 15              |
| <i>Areca catechu</i>             | binlang        | 23              | <i>Daucus carota</i>               | nanheshi        | 15              |
| <i>Mentha haplocalyx</i>         | bohe           | 11              | <i>Schisandra sphenanthera</i>     | nanwuweizi      | 12              |
| <i>Psoralea corylifolia</i>      | buguzhi        | 29              | <i>Rhododendron molle</i>          | naoyanghua      | 16              |
| <i>Atractylodes lancea</i>       | cangzhu        | 29              | <i>Arctium lappa</i>               | niubangzi       | 10              |
| <i>Platycladus orientalis</i>    | cebaiye        | 19              | <i>Achyranthes bidentata</i>       | niuxi           | 12              |

|                                |                 |    |                                |              |     |
|--------------------------------|-----------------|----|--------------------------------|--------------|-----|
| <i>Bupleurum chinense</i>      | chaihu          | 49 | <i>Ligustrum lucidum</i>       | nvzhenzi     | 20  |
| <i>Citrus reticulata</i>       | chenpi          | 41 | <i>Eupatorium fortunei</i>     | peilan       | 27  |
| <i>Aquilaria sinensis</i>      | chenxiang       | 28 | <i>Fritillaria ussuriensis</i> | pingbeimu    | 10  |
| <i>Plantago asiatica</i>       | cheqiancao      | 12 | <i>Eriobotrya japonica</i>     | pipaye       | 19  |
| <i>Paeonia lactiflora</i>      | chishao         | 9  | <i>Taraxacum officinale</i>    | pugongying   | 26  |
| <i>Vigna angularis</i>         | chixiaodou      | 5  | <i>Typha angustata</i>         | puhuang      | 17  |
| <i>Dioscorea nipponica</i>     | chuanshanlong   | 7  | <i>Notopterygium incisum</i>   | qianghuo     | 44  |
| <i>Aconitum carmichaeli</i>    | chuanwu         | 25 | <i>Peucedanum praeruptorum</i> | qianhu       | 25  |
| <i>Andrographis paniculata</i> | chuanxinlian    | 24 | <i>Euphorbia lathyris</i>      | qianjinzi    | 10  |
| <i>Ligusticum chuanxiong</i>   | chuanxiong      | 58 | <i>Pharbitis nil</i>           | qianniuzi    | 12  |
| <i>Ailanthus altissima</i>     | chunpi          | 15 | <i>Sinomenium acutum</i>       | qingfengteng | 13  |
| <i>Acanthopanax senticosus</i> | ciwujia         | 17 | <i>Artemisia annua</i>         | qinghao      | 104 |
| <i>Rheum officinale</i>        | dahuang         | 31 | <i>Gentiana macrophylla</i>    | qinjiao      | 13  |
| <i>Angelica sinensis</i>       | danggui         | 51 | <i>Dianthus superbus</i>       | qumai        | 8   |
| <i>Codonopsis pilosula</i>     | dangshen        | 57 | <i>Lonicera japonica</i>       | rendongteng  | 3   |
| <i>Salvia miltiorrhiza</i>     | danshen         | 65 | <i>Panax ginseng</i>           | renshen      | 78  |
| <i>Oryza sativa</i>            | daoya           | 20 | <i>Cistanche deserticola</i>   | roucongong   | 27  |
| <i>Isatis indigotica</i>       | daqingye        | 15 | <i>Myristica fragrans</i>      | roudoukou    | 11  |
| <i>Allium sativum</i>          | dasuan          | 30 | <i>Cinnamomum cassia</i>       | rougui       | 11  |
| <i>Sargentodoxa cuneata</i>    | daxueteng       | 6  | <i>Boswellia carterii</i>      | ruxiang      | 14  |
| <i>Gleditsia sinensis</i>      | dazaojiao       | 4  | <i>Saururus chinensis</i>      | sanbaicao    | 19  |
| <i>Ziziphus jujuba</i>         | dazao           | 34 | <i>Morus alba (cortex)</i>     | sangbaipi    | 47  |
| <i>Juncus effuses</i>          | dengxincao      | 13 | <i>Morus alba (mulberry)</i>   | sangshen     | 10  |
| <i>Kadsura interior</i>        | dianjixueteng   | 17 | <i>Morus alba (folium)</i>     | sangye       | 42  |
| <i>Rehmannia glutinosa</i>     | dihuang         | 67 | <i>Morus alba (ramulus)</i>    | sangzhi      | 16  |
| <i>Eugenia caryophyllata</i>   | dingxiang       | 19 | <i>Panax notoginseng</i>       | sanqi        | 51  |
| <i>Sanguisorba officinalis</i> | diyu            | 31 | <i>Hippophae rhamnoides</i>    | shaji        | 48  |
| <i>Cordyceps sinensis</i>      | dongchongxiacao | 19 | <i>Sophora tonkinensis</i>     | shandougen   | 20  |

|                                 |                |    |                                  |                 |    |
|---------------------------------|----------------|----|----------------------------------|-----------------|----|
| <i>Rabdosia rubescens</i>       | donglingcao    | 31 | <i>Phytolacca acinosa</i>        | shanglu         | 11 |
| <i>Amomum kravanh</i>           | doukou         | 7  | <i>Kaempferia galanga</i>        | shannai         | 9  |
| <i>Angelica pubescens</i>       | duhuo          | 41 | <i>Dioscorea opposita</i>        | shanyao         | 21 |
| <i>Eucommia ulmoides</i>        | duzhong        | 34 | <i>Crataegus pinnatifida</i>     | shanzha         | 18 |
| <i>Saposhnikovia divaricata</i> | fangfeng       | 24 | <i>Cornus officinalis</i>        | shanzhuyu       | 30 |
| <i>Stephania tetrandra</i>      | fangji         | 17 | <i>Astragalus complanatus</i>    | shayuanzi       | 5  |
| <i>Cassia acutifolia</i>        | fanxieye       | 8  | <i>Cnidium monnieri</i>          | shechuangzi     | 20 |
| <i>Dioscorea hypoglauca</i>     | fenbixie       | 10 | <i>Belamcanda chinensis</i>      | shegan          | 16 |
| <i>Apis mellifera</i>           | fengjiao       | 10 | <i>Zingiber officinale</i>       | shengjiang      | 77 |
| <i>Poria cocos</i>              | fuling         | 33 | <i>Cimicifuga foetida</i>        | shengma         | 10 |
| <i>Aconitum carmichaeli</i>     | fuzi           | 39 | <i>Lycopodium japonicum</i>      | shenjincao      | 17 |
| <i>Glycyrrhiza uralensis</i>    | gancao         | 84 | <i>Dendrobium nobile</i>         | shihu           | 20 |
| <i>Zingiber officinale</i>      | ganjiang       | 29 | <i>Punica granatum</i>           | shiliupi        | 11 |
| <i>Nardostachys chinensis</i>   | gansong        | 29 | <i>Silybum marianum</i>          | shuifeiji       | 13 |
| <i>Euphorbia kansui</i>         | gansui         | 42 | <i>Luffa cylindrica</i>          | sigualuo        | 9  |
| <i>Ligusticum sinense</i>       | gaoben         | 11 | <i>Ziziphus jujuba</i>           | suanzaoren      | 21 |
| <i>Alpinia officinarum</i>      | gaoliangjiang  | 22 | <i>Caesalpinia sappan</i>        | sumu            | 28 |
| <i>Pueraria lobata</i>          | gegen          | 20 | <i>Aesculus chinensis</i>        | suoluozi        | 10 |
| <i>Lycium chinense</i>          | gouqizi        | 41 | <i>Santalum album</i>            | tanxiang        | 24 |
| <i>Uncaria rhynchophylla</i>    | gouteng        | 31 | <i>Asparagus cochinchinensis</i> | tiandong        | 14 |
| <i>Trichosanthes kirilowii</i>  | gualou         | 30 | <i>Trichosanthes kirilowii</i>   | tianhuafen      | 9  |
| <i>Pogostemon cablin</i>        | guanghuoxiang  | 23 | <i>Gastrodia elata</i>           | tianma          | 18 |
| <i>Phellodendron amurense</i>   | guanhuangbai   | 22 | <i>Cinnamomum camphora</i>       | tianranbingpian | 12 |
| <i>Hypericum perforatum</i>     | guanyejinsitao | 10 | <i>Hyoscyamus niger</i>          | tianxianzi      | 24 |
| <i>Cinnamomum cassia</i>        | guizhi         | 10 | <i>Tetrapanax papyriferus</i>    | tongcao         | 14 |
| <i>Piper kadsura</i>            | haifengteng    | 30 | <i>Bolbostemma paniculatum</i>   | tubeimu         | 12 |
| <i>Eclipta prostrata</i>        | hanmolian      | 11 | <i>Smilax glabra</i>             | tufuling        | 9  |
| <i>Albizia julibrissin</i>      | hehuanpi       | 22 | <i>Pseudolarix amabilis</i>      | tujingpi        | 24 |



|                                      |            |    |                                |               |    |
|--------------------------------------|------------|----|--------------------------------|---------------|----|
| <i>Glycine max</i>                   | heidou     | 21 | <i>Cuscuta australis</i>       | tusizi        | 8  |
| <i>Carpesium abrotanoides</i>        | heshi      | 7  | <i>Vaccaria segetalis</i>      | wangbuliuxing | 11 |
| <i>Polygonum multiflorum</i>         | heshouwu   | 13 | <i>Claviceps purpurea</i>      | weilingxian   | 8  |
| <i>Juglans regia</i>                 | hetaoren   | 26 | <i>Schisandra chinensis</i>    | wuweizi       | 68 |
| <i>Nelumbo nucifera</i>              | heye       | 13 | <i>Lindera aggregata</i>       | wuyao         | 17 |
| <i>Terminalia chebula</i>            | hezi       | 13 | <i>Evodia rutaecarpa</i>       | wuzhuyu       | 47 |
| <i>Alpinia galanga</i>               | hongdoukou | 13 | <i>Prunella vulgaris</i>       | xiakucao      | 32 |
| <i>Carthamus tinctorius</i>          | honghua    | 32 | <i>Cyperus rotundus</i>        | xiangfu       | 18 |
| <i>Magnolia officinalis</i>          | houpu      | 44 | <i>Periploca sepium</i>        | xiangjiapi    | 36 |
| <i>Sophora japonica</i>              | huaihua    | 7  | <i>Citrus medica</i>           | xiangyuan     | 8  |
| <i>Zanthoxylum bungeanum</i>         | huajiao    | 11 | <i>Curculigo orchioides</i>    | xianmao       | 17 |
| <i>Coptis chinensis</i>              | huanglian  | 12 | <i>Foeniculum vulgare</i>      | xiaohuixiang  | 11 |
| <i>Scutellaria baicalensis</i>       | huangqin   | 44 | <i>Podophyllum emodii</i>      | xiaoyelian    | 15 |
| <i>Astragalus membranaceus</i>       | huangqi    | 16 | <i>Rubia cordifolia</i>        | xicao         | 42 |
| <i>Fritillaria hupehensis</i>        | hubeibeimu | 10 | <i>Allium macrostemon</i>      | xiebai        | 19 |
| <i>Picrorhiza scrophulariaeflora</i> | huhuaglian | 12 | <i>Crocus sativus</i>          | xihonghua     | 42 |
| <i>Piper nigrum</i>                  | hujiao     | 55 | <i>Magnolia denudata</i>       | xinyi         | 13 |
| <i>Viscum coloratum</i>              | hujisheng  | 5  | <i>Siegesbeckia orientalis</i> | xixiancao     | 27 |
| <i>Trigonella foenumgraecum</i>      | huluba     | 40 | <i>Asarum sieboldii</i>        | xixin         | 22 |
| <i>Cannabis sativa</i>               | huomaren   | 9  | <i>Panax quinquefolium</i>     | xiyangshen    | 25 |
| <i>Polygonum cuspidatum</i>          | huzhang    | 25 | <i>Inula britannica</i>        | xuanfuhua     | 15 |
| <i>Dalbergia odorifera</i>           | jiangxiang | 34 | <i>Dipsacus asperoides</i>     | xuduan        | 12 |
| <i>Platycodon grandiflorum</i>       | jiegang    | 12 | <i>Brucea javanica</i>         | yadanzi       | 58 |
| <i>Brassica juncea</i>               | jiezi      | 16 | <i>Cissampelos pareira</i>     | yahunu        | 16 |
| <i>Celosia cristata</i>              | jiguanhua  | 10 | <i>Corydalis yanhusuo</i>      | yanhusuo      | 31 |
| <i>Abrus cantoniensis</i>            | jigucao    | 11 | <i>Chrysanthemum indicum</i>   | yejuhua       | 9  |
| <i>Tribulus terrestris</i>           | jili       | 15 | <i>Eupatorium lindleyanum</i>  | yemazhui      | 20 |
| <i>Inula japonica</i>                | jinfecao   | 23 | <i>Stauntonia chinensis</i>    | yemugua       | 6  |

|                                   |               |     |                                  |               |    |
|-----------------------------------|---------------|-----|----------------------------------|---------------|----|
| <i>Schizonepeta tenuifolia</i>    | jingjie       | 22  | <i>Leonurus artemisia</i>        | yimucao       | 30 |
| <i>Ajuga decumbens</i>            | jinguciao     | 21  | <i>Stellaria dichotoma</i>       | yinchaihu     | 14 |
| <i>Conyza blinii</i>              | jinlongdancao | 8   | <i>Artemisia capillaries</i>     | yinchen       | 54 |
| <i>Lysimachia christinae</i>      | jinqiancao    | 3   | <i>Papaver somniferum</i>        | yingsuke      | 13 |
| <i>Psammosilene tunicoides</i>    | jintiesuo     | 8   | <i>Ginkgo biloba</i>             | yinxingye     | 20 |
| <i>Rosa laevigata</i>             | jinyingzi     | 12  | <i>Epimedium brevicornum</i>     | yinyanghuo    | 14 |
| <i>Lonicera japonica</i>          | jinyinhua     | 32  | <i>Solidago decurrens</i>        | yizhihuanghua | 8  |
| <i>Murraya paniculata</i>         | jiulixiang    | 60  | <i>Alpinia oxyphylla</i>         | yizhi         | 26 |
| <i>Centella asiatica</i>          | jixuecao      | 7   | <i>Daphne genkwa</i>             | yuanhua       | 11 |
| <i>Selaginella tamariscina</i>    | juanbai       | 12  | <i>Polygala tenuifolia</i>       | yuanzhi       | 29 |
| <i>Cassia tora</i>                | juemingzi     | 15  | <i>Phyllanthus emblica</i>       | yuganzi       | 44 |
| <i>Chrysanthemum morifolium</i>   | juhua         | 10  | <i>Curcuma longa</i>             | yujin         | 22 |
| <i>Cichorium intybus</i>          | juju          | 11  | <i>Houttuynia cordata</i>        | yuxingcao     | 23 |
| <i>Tussilago farfara</i>          | kuandonghua   | 18  | <i>Echinops grijsii</i>          | yuzhouloulou  | 9  |
| <i>Corydalis bungeana</i>         | kudiding      | 11  | <i>Acorus calamus</i>            | zangcangpu    | 28 |
| <i>Melia azedarach</i>            | kulianpi      | 31  | <i>Alisma orientale</i>          | zexie         | 29 |
| <i>Picrasma quassioides</i>       | kumu          | 76  | <i>Fritillaria thunbergii</i>    | zhebeimu      | 31 |
| <i>Sophora flavescens</i>         | kushen        | 74  | <i>Anemarrhena asphodeloides</i> | zhimu         | 23 |
| <i>Prunus armeniaca</i>           | kuxingren     | 22  | <i>Citrus aurantium</i>          | zhishi        | 12 |
| <i>Picria felterrae</i>           | kuxuanshen    | 9   | <i>Valeriana jatamansii</i>      | zhizhuxiang   | 17 |
| <i>Capsicum annuum</i>            | lajiao        | 33  | <i>Gardenia jasminoides</i>      | zhizi         | 27 |
| <i>Zanthoxylum nitidum</i>        | liangmianzhen | 12  | <i>Panax pseudoginseng</i>       | zhujieshen    | 6  |
| <i>Forsythia suspensa</i>         | lianqiao      | 27  | <i>Arnebia euchroma</i>          | zicao         | 28 |
| <i>Nelumbo nucifera (plumule)</i> | lianxixin     | 9   | <i>Peucedanum decursivum</i>     | zihuaqianhu   | 17 |
| <i>Nelumbo nucifera (seed)</i>    | lianzi        | 10  | <i>Perilla frutescens</i>        | zisuye        | 10 |
| <i>Ganoderma lucidum</i>          | lingzhi       | 102 | <i>Aster tataricus</i>           | ziwan         | 17 |
